# Supplementary material for: De Novo Mutation of m.3243A>G together with m.16093T>C Associated with Atypical Clinical Features in a Pedigree with MIDD Syndrome
Source: Hindawi journal article supplement (doi:10.1155/2019/5184647), 2019-04-04
Supplement: f1 [file 5184647.f1.pdf]

Table S1. M.3243A&gt;G Heteroplasmy among Individuals from 10 Pedigrees of MIDD

| Pedigree | Person      | Sex<br>(F/M) | Age<br>(years) | Heteroplasmy, % |        |                |
|----------|-------------|--------------|----------------|-----------------|--------|----------------|
|          |             |              |                | Leukocytes      | Saliva | Urine Sediment |
| F1921    | F1921- I-1  | F            | 55             | 19.43           | 22.69  | 63.14          |
|          | F1921- II-1 | F            | 31             | 35.35           | 36.54  | 63.14          |
|          | F1921- II-2 | F            | 32             | 22.69           | 28.33  | 38.93          |
| F1955    | F1955- I-1  | M            | 74             | 0.84            | 3.20   | 15.23          |
| F1932    | F1932- I-1  | F            | 60             | 10.29           | 13.21  | 32.98          |
|          | F1932- II-1 | F            | 32             | 14.21           | 19.43  | 60.75          |
|          | F1932- II-2 | M            | 30             | 32.98           | 43.77  | 84.33          |
| F1958    | F1958- I-1  | F            | 48             | 11.25           | 15.23  | 59.55          |
|          | F1958- I-2  | F            | 45             | 26.05           | 29.48  | 69.01          |
|          | F1958- II-1 | F            | 21             | 3.20            | 3.20   | 5.73           |
|          | F1958- II-2 | M            | 24             | 44.98           | 55.93  | 90.16          |
| F1949    | F1949- I-1  | M            | 63             | 4.87            | 10.29  | 49.85          |
|          | F1949- I-2  | M            | 56             | 13.21           | 16.26  | 65.51          |
|          | F1949- I-3  | M            | 50             | 18.36           | 29.48  | 84.33          |
|          | F1949- II-1 | M            | 45             | -               | -      | -              |
|          | F1949- II-2 | M            | 30             | -               | -      | -              |
| F1956    | F1956- I-1  | M            | 72             | 5.73            | 8.41   | 37.73          |
| F1918    | F1918- I-1  | M            | 59             | 19.43           | 32.98  | 75.82          |
|          | F1918- II-1 | M            | 51             | 12.22           | 22.69  | 73.59          |
|          | F1918- II-2 | M            | 45             | 16.26           | 31.81  | 80.17          |
| F1932    | F1932- I-1  | M            | 57             | 12.22           | 14.21  | 34.16          |
| F1957    | F1957- I-1  | F            | 80             | -               | -      | -              |
|          | F1956- I-2  | M            | 83             | -               | -      | -              |
|          | F1957- II-1 | F            | 60             | 6.22            | 12.22  | 64.33          |
|          | F1957- II-2 | F            | 57             | -               | -      | -              |
|          | F1957- II-3 | F            | 55             | -               | -      | -              |
|          | F1957- II-4 | F            | 51             | -               | -      | -              |
|          | F1957-III-1 | M            | 31             | 32.28           | 43.77  | 88.27          |
| F1989    | F1989- I-1  | F            | 48             | 12.22           | 23.80  | 71.32          |
|          | F1989- II-1 | F            | 44             | 27.18           | 29.48  | 69.01          |
|          | F1989- II-2 | F            | 28             | 17.30           | 20.50  | 40.14          |

- : negative
